# Supplementary material for: Pt anchored in the skeleton of rice husk-based ZSM-5 for excellent catalytic VOC oxidation: structure–activity relationship and environmental impact assessment
Source: Royal Society of Chemistry journal article supplement (doi:10.1039/d3gc04482c), 2024-01-01
Supplement: d3gc04482c1.pdf [file d3gc04482c1.pdf]

## Supplementary Information

# Pt anchored in skeleton of rice husk directed ZSM-5 for excellent catalytic VOCs oxidation: Structure- activity relationship and environmental impact assessment

Wenxin Lan<sup>a</sup>, Muping Shen<sup>a</sup>, Yinye Chen<sup>a</sup>, Kui Niu<sup>a</sup>, Weiming Zhou<sup>a,\*</sup>, Jing Xu<sup>a</sup>,  
Baoquan Huang<sup>a,\*</sup>, Hongjie Cai<sup>a</sup>, Jiachang Zuo<sup>b</sup>, Daifeng Lin<sup>a,c</sup>, Yongjin Luo<sup>a,\*</sup>,  
Qingrong Qian<sup>a</sup>, Qinghua Chen<sup>a</sup>

<sup>a</sup>Fujian Key Laboratory of Pollution Control & Resource Reuse, Fujian Normal University, Fuzhou  
350117, China

<sup>b</sup> State Key Lab of Physical Chemistry of Solid Surfaces, National Engineering Lab for Green  
Chemical Productions of Alcohols-Ethers-Esters, College of Chemistry and Chemical Engineering,  
Xiamen University, Xiamen 361005, China

<sup>c</sup> Fujian Provincial Key Lab of Coastal Basin Environment, Fujian Polytechnic Normal University,  
Fuqing 350300, China

### Corresponding author

\* Weiming Zhou: Fujian Key Laboratory of Pollution Control & Resource Reuse,  
Fujian Normal University, Fuzhou 350117, China. Tel/Fax: 0591-83465158. E-mail:  
zhouweiming721@126.com.

\* Baoquan Huang: Fujian Key Laboratory of Pollution Control & Resource Reuse,  
Fujian Normal University, Fuzhou 350117, China. Tel/Fax: 0591-83465158. E-mail:  
qbh811@fjnu.edu.cn.

\* Yongjin Luo: Fujian Key Laboratory of Pollution Control & Resource Reuse, Fujian  
Normal University, Fuzhou 350117, China. Tel/Fax: 0591-83465158. E-mail:  
yongjinluo@fjnu.edu.cn.

## Materials

Rice husk powder less than 30 mesh was purchased from Lianyungang, Jiangsu Province,  $\text{H}_2\text{PtCl}_6 \cdot 6\text{H}_2\text{O}$  (AR,  $\text{Pt} \geq 37.5\%$ ) was purchased from Aladdin Chemical Reagent Co., Ltd.  $\text{Al}_2(\text{SO}_4)_3 \cdot 18\text{H}_2\text{O}$  (AR,  $\geq 99.0\%$ ), NaOH (AR,  $\geq 96.0\%$ ), TPABr (AR, 99%) and HCl (AR, 35-38%) were purchased from Sinopharm Chemical Reagent Co., Ltd.

## Characterization and Catalytic evaluation

The prepared catalysts were characterized by techniques as follows: X-ray diffraction (XRD),  $\text{N}_2$  adsorption-desorption, scanning electron microscopy (SEM), transmission electron microscopy (TEM), inductively coupled plasma (ICP), temperature-programmed desorption of  $\text{NH}_3$  ( $\text{NH}_3$ -TPD), temperature-programmed desorption of  $\text{C}_7\text{H}_8$  ( $\text{C}_7\text{H}_8$ -TPD), pyridine adsorption infrared spectrometry (Py-IR), X-ray photoelectron spectroscopy (XPS), in situ diffuse reflectance infrared Fourier spectroscopy (DRIFTS) and life-cycle assessment (LCA).

X-ray powder diffraction (XRD) analysis was performed on Bruker D8 Advance diffractometer with  $\text{Cu-K}\alpha$  radiation source in the range of  $5\text{-}80^\circ$ .  $\text{N}_2$  adsorption-desorption measurements were carried out on the Micromeritics ASAP 2460 instrument at  $-196^\circ\text{C}$  and fresh samples were pretreated in vacuum at  $120^\circ\text{C}$  for 2 h. The morphology of the prepared samples was studied by a scanning electron microscope (SEM, Hitachi Regulus 8100, Japanese). High-resolution transmission electron microscopy (HRTEM) and HAADF-STEM images were observed on a FEI Talos F200x microscope operating at 200 kV. The metal content of the samples was determined by Inductively coupled plasma (ICP) on Agilent 5110. Surface elemental valence and concentration were studied under monochromatic  $\text{Al-K}\alpha$  radiation ( $1,486.6\text{ eV}$ ) source on Escalab 250 Xi XPS instrument.

$\text{NH}_3$  temperature-programmed desorption ( $\text{NH}_3$ -TPD),  $\text{C}_7\text{H}_8$  temperature-programmed desorption ( $\text{C}_7\text{H}_8$ -TPD) and  $\text{C}_7\text{H}_8$  temperature programmed surface

reactions ( $C_7H_8$ -TPSR) of the catalysts were carried out on a Micromeritics apparatus (AutoChem II 2920) connected with a mass spectrometer (Cirrus), where the  $NH_3$ ,  $CO_2$  and  $C_7H_8$  signals were recorded with  $m/z = 17, 44$  and  $92$ , respectively. For  $NH_3$ -TPD and  $C_7H_8$ -TPD, each 50 mg sample was firstly treated with 10 vol%  $NH_3/He$  ( $NH_3$ -TPD) and 500 ppm  $C_7H_8/Ar$  ( $C_7H_8$ -TPD) streams (30 mL/min) at 300 °C for 1 h, and then cooled down to room temperature, the atmosphere was switched to pure He (30 mL/min) and heated to 800 °C at a heating rate of 10 °C/min. For  $C_7H_8$ -TPSR, 50 mg of each sample was treated with 3 vol%  $O_2/He$  (30 mL/min) at 300 °C for 1 h and cooled down to room temperature. Then, the atmosphere was transferred to  $C_7H_8/Ar$  (30 mL/min) and the temperature was heated up to 800 °C at a heating rate of 10 °C/min.

Pyridine adsorption infrared spectrometry (Py-IR) and in situ diffuse reflection infrared Fourier transform spectra (in situ DRIFTS) were carried out to detect the acidity and the adsorbed species on the catalyst surface using a Thermo Scientific Nicolet iS10 equipped with Harrick Praying Mantis diffuse reflectance accessories and a high temperature reaction chamber.

For Py-IR, the catalyst was pretreated at 300 °C for 1 h in a gas flow of He to remove any adsorbed impurities, and then cooled down to 250, 200, 150, 100, 30 °C, respectively. The background spectrum was collected under each temperature. Afterward, He (15 mL/min) carrying Pyridine was introduced to the sample chamber and adsorbed to saturation at 30 °C. Subsequently, the pyridine desorption was collected at 30-300 °C. At each temperature, the catalyst was exposed to a flow of He (30 mL/min) for 15 min, and then a series of IR spectra were collected.

For in situ DRIFTS, prior to each experiment, the catalyst was pretreated at 300 °C for 1 h in a gas flow of  $N_2$  to remove any adsorbed impurities, and then cooled down to 100 °C. The background spectrum was collected under  $N_2$  and automatically subtracted from the sample spectra. Afterward, 1000 ppm  $C_7H_8/N_2$  (30 mL/min) was introduced for 1 min, and the catalyst was purged by  $N_2$  for the next 2 min to remove adsorbed residuals on the catalyst surface. Subsequently, the reaction gas was switched to  $O_2$  for

30 mL/min at 100 °C, and the DRIFTS spectra of the samples were collected at a specific time. After that, in situ DRIFTS of C<sub>7</sub>H<sub>8</sub> oxidation over the catalyst were recorded at 100-175 °C. At each temperature, the catalyst was exposed to a flow of O<sub>2</sub> (30 mL/min) for 3 min followed by N<sub>2</sub> purging for another 2 min, and then a series of IR spectra were collected.

The life-cycle assessment (LCA) was applied using SimaPro 9.0 software and considered the entire life cycle of Pt/ZSM-5, from the extraction of raw materials to the final disposal. Then, an evaluation of the environmental impacts using the ReCipe 2016 Midpoint method was performed.

The activity for C<sub>7</sub>H<sub>8</sub> total oxidation was measured in a continuous flow system in a fixed bed reactor at atmospheric pressure. Each Catalyst (100 mg, 30-80 mesh) with 200 mg quartz sand (30-80 mesh) was loaded in the quartz reactor. 1000 ppm C<sub>7</sub>H<sub>8</sub>/Air was purged into the reactor at a continuous flow 100 mL/min (WHSV = 60,000 mL/(h·g)). After reaching a stable flow, the reactants were passed through the catalyst bed and the temperature was increased from room temperature to 300 °C (5 °C/min). For catalytic activity tests and stability tests with water vapor, a certain fraction of H<sub>2</sub>O (1 vol.%, 2 vol.%, 5 vol.%) was fed into the reaction system. The concentrations of the reactants and products were detected online by Agilent-8860 gas chromatograph equipped with a hydrogen flame ionization detector (FID) and a thermal conductivity detector (TCD). Toluene conversion (X<sub>Toluene</sub>, %) was calculated using the following formula:

$$X_{\text{Toluene}} (\%) = \frac{C_{\text{in}} - C_{\text{out}}}{C_{\text{in}}} \times 100\%$$

C<sub>in</sub> and C<sub>out</sub> are toluene concentrations at the inlet and outlet of the feed flow, respectively.

The CO<sub>2</sub> selectivity (S<sub>CO<sub>2</sub></sub>, %) was defined as the ratio of toluene converted into CO<sub>2</sub> to the total degraded toluene, which was calculated as:

$$S_{\text{CO}_2} (\%) = \frac{C_{\text{CO}_2}}{\alpha \times X_{\text{Toluene}}} \times 100\%$$

where  $C_{\text{CO}_2}$  represents the  $\text{CO}_2$  concentration in the outlet gas,  $\alpha$  refers to the theoretical  $\text{CO}_2$  concentration.

The  $\text{C}_7\text{H}_8$  reaction rate at 175 °C ( $R_{175}$ ) was calculated by equation:

$$R_{175} = \frac{C_{175} \times V_{\text{C}_7\text{H}_8}}{m_{\text{cat}}}$$

Where  $C_{175}$  is  $\text{C}_7\text{H}_8$  conversion rate (%) at 175 °C,  $V_{\text{C}_7\text{H}_8}$  is  $\text{C}_7\text{H}_8$  flow rate ( $\mu\text{mol}\cdot\text{s}^{-1}$ ),  $m_{\text{cat}}$  is the mass of Pt/ZSM-5 in the catalyst (g).

The  $\text{C}_7\text{H}_8$  specific reaction rate at 175 °C ( $R_{175}$ ) was calculated by equation:

$$S_{175} = \frac{R_{175}}{S_{\text{BET}}}$$

Where  $S_{\text{BET}}$  is specific surface area of catalyst ( $\text{m}^2\cdot\text{g}^{-1}$ ).

$E_a$  was calculated using the Arrhenius equation as follows:

$$\ln k = \ln A - \frac{E_a}{RT}$$

where  $k$  is the reaction rate ( $\text{mol}\cdot\text{s}^{-1}$ ),  $E_a$  is the apparent activation energy ( $\text{kJ}\cdot\text{mol}^{-1}$ ), and  $A$  is the pre-exponential factor.

Finally, cycling tests of the Pt/ZSM-5-T2 catalyst for  $\text{C}_7\text{H}_8$  oxidation were measured. The test was performed for a continuous five cycles (1000 ppm  $\text{C}_7\text{H}_8/\text{Air}$  with the flow rate of 100 mL/min), and in each cycle, the temperature is first increased up to 300 °C then cooled to room temperature. Moreover, for catalytic activity tests and stability tests with water vapor, a certain mass fraction of  $\text{H}_2\text{O}$  was fed into the entire reaction system by the heating belt heating reaction route via a liquid phase pump.

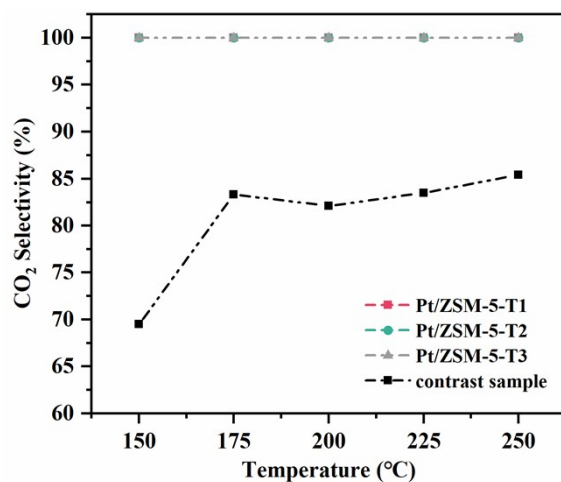

Fig. S1 CO<sub>2</sub> selectivity of all the samples.

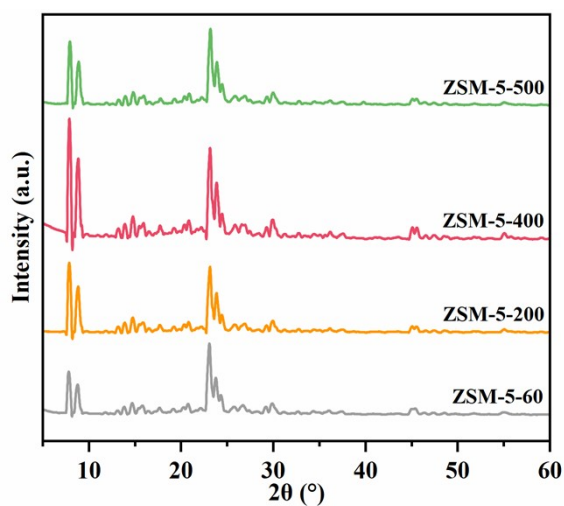

Fig. S2 XRD patterns of ZSM-5 molecular sieves with different SiO<sub>2</sub>/Al<sub>2</sub>O<sub>3</sub> [1].

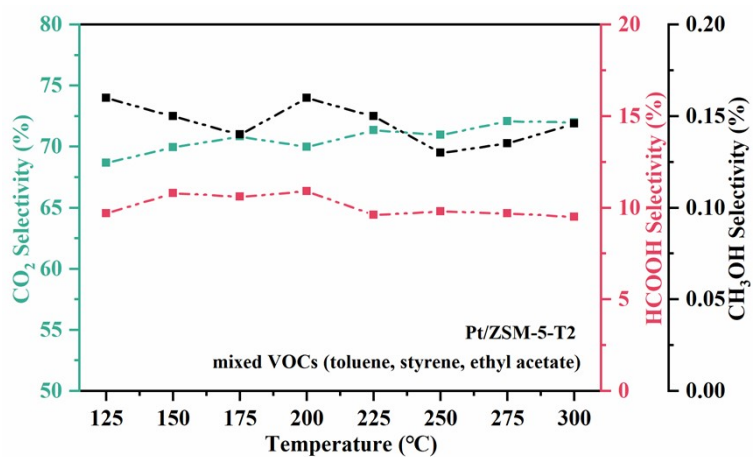

Fig. S3 Products selectivity of VOCs on Pt/ZSM-5-T2 catalyst.

**Table S1.** The calcination conditions of rice husk powder and corresponding mass values.

| Sample                    | Calcination condition of rice husk powder | Mass of rice husk powder before calcination (g) | Mass after calcination (g) |
|---------------------------|-------------------------------------------|-------------------------------------------------|----------------------------|
| SiO <sub>2</sub>          | 550 °C, 4 h                               | 6                                               | 0.955                      |
| SiO <sub>2</sub> -8.7 %C  | 450 °C, 2 h                               | 6                                               | 1.045                      |
| SiO <sub>2</sub> -23.6 %C | 450 °C, 1 h                               | 6                                               | 1.25                       |

So the carbon content:

$$(1.045-0.955)/1.045 = 8.7 \text{ wt.}\%$$

$$(1.25-0.955)/1.25 = 23.6 \text{ wt.}\%$$

**Table S2.** Catalytic testing conditions and comparison of catalytic activities ( $T_{90}$ ,  $R_{175}$ ) of as-prepared Pt/ZSM-5 catalysts with previously reported catalysts.

| Catalysts                            | Pollutant Type                   | Concentration (ppm)/Flow rate                         | WHSV ( $\text{mL}\cdot\text{g}^{-1}\cdot\text{h}^{-1}$ ) | $T_{90}$ ( $^{\circ}\text{C}$ ) | $R_{175}$ ( $\mu\text{mol}\cdot\text{g}^{-1}\cdot\text{s}^{-1}$ ) | Ref       |
|--------------------------------------|----------------------------------|-------------------------------------------------------|----------------------------------------------------------|---------------------------------|-------------------------------------------------------------------|-----------|
| Pt/ZSM-5-T1                          |                                  |                                                       |                                                          | 194                             | 0.387                                                             | This work |
| Pt/ZSM-5-T2                          | $\text{C}_7\text{H}_8$           | 1000 ppm                                              | 60,000                                                   | 170                             | 0.733                                                             |           |
| Pt/ZSM-5-T3                          |                                  | $\text{C}_7\text{H}_8$ , air                          |                                                          | 174                             | 0.692                                                             |           |
| Pt/PZN-2                             | $\text{C}_7\text{H}_8$           | 1000 ppm                                              | 60,000                                                   | 176                             | 0.618                                                             | [2]       |
| Pt/CZ-500                            |                                  | $\text{C}_7\text{H}_8$ , air                          |                                                          | 202                             | 0.015                                                             |           |
| $\text{Pd}_8\text{Cu}_2/\text{MZ}$   | $\text{C}_7\text{H}_8$           | 50 ppm                                                | 3,6000                                                   | 152                             | 0.022                                                             | [3]       |
|                                      |                                  | $\text{C}_7\text{H}_8$ , air                          |                                                          |                                 |                                                                   |           |
| $\text{Co}_{3-x}\text{O}_{4-y}$      | $\text{C}_7\text{H}_8$           | 300 ppm                                               | 7,2000                                                   | 146                             | 0.192                                                             | [4]       |
| $\text{Co}_{3-x}\text{O}_4$          |                                  | $\text{C}_7\text{H}_8$ , air                          |                                                          | 180                             | 0.113                                                             |           |
| Pt NPs@ $\text{Co}_3\text{O}_4$      |                                  | 1000 ppm                                              |                                                          | 179                             | 0.261                                                             | [5]       |
| Pt- $\text{Co}_3\text{O}_4$          | $\text{C}_7\text{H}_8$           | $\text{C}_7\text{H}_8$ , 20 % $\text{O}_2/\text{N}_2$ | 60,000                                                   | 185                             | 0.106                                                             |           |
| Pt ion@ $\text{Co}_3\text{O}_4$      |                                  |                                                       |                                                          | 194                             | 0.063                                                             |           |
| Pt/ZSM-5-T2                          | $\text{C}_8\text{H}_8$           | 200 ppm                                               | 60,000                                                   | 196                             | 0.091                                                             | This work |
|                                      |                                  | $\text{C}_8\text{H}_8$ , air                          |                                                          |                                 |                                                                   |           |
| $\text{CeO}_2\text{-C}$              | $\text{C}_8\text{H}_8$           | 600 ppm                                               | 15,000                                                   | 350                             | 0.020                                                             | 6         |
| $\text{CeO}_2\text{-O}$              |                                  | $\text{C}_8\text{H}_8$ , air                          |                                                          | 221                             | 0.049                                                             |           |
| TS-1                                 | $\text{C}_8\text{H}_8$           | 200 ppm                                               | 75,000                                                   | 326                             | 0.000                                                             | 7         |
|                                      |                                  | $\text{C}_8\text{H}_8$ , air                          |                                                          |                                 |                                                                   |           |
| Pt/ZSM-5-T2                          | $\text{C}_4\text{H}_8\text{O}_2$ | 1000 ppm                                              | 60,000                                                   | 325                             | 0.084                                                             | This work |
|                                      |                                  | $\text{C}_4\text{H}_8\text{O}_2$ , air                |                                                          |                                 |                                                                   |           |
| 1Ru/ $\text{TiO}_2$                  | $\text{C}_4\text{H}_8\text{O}_2$ | 500 ppm                                               | 60,000                                                   | 237                             | 0.047                                                             | 8         |
|                                      |                                  | $\text{C}_4\text{H}_8\text{O}_2$ , air                |                                                          |                                 |                                                                   |           |
| $\text{MnO}_x\text{-CeO}_2\text{-h}$ | $\text{C}_4\text{H}_8\text{O}_2$ | 500 ppm                                               | 60,000                                                   | 224                             | 0.050                                                             | 9         |
|                                      |                                  | $\text{C}_4\text{H}_8\text{O}_2$ , air                |                                                          |                                 |                                                                   |           |



**Table S3.** Input and output of Pt/ZSM-5 catalysts in a LCA analysis.

| Pt/ZSM-5-T1 in This work                                            |          |      |
|---------------------------------------------------------------------|----------|------|
| Input/Output                                                        | Quantity | Unit |
| Step1: Rice husk powder Pre-treatment                               |          |      |
| Input                                                               |          |      |
| Rice husk powder                                                    | 6.965    | KG   |
| Energy (heating)                                                    | 20.3     | KWh  |
| Output                                                              |          |      |
| SiO <sub>2</sub> template (T1)                                      | 1.19567  | KG   |
| Step2: ZSM-5 Synthesis                                              |          |      |
| Input                                                               |          |      |
| T1                                                                  | 1.19567  | KG   |
| Al <sub>2</sub> (SO <sub>4</sub> ) <sub>3</sub> ·18H <sub>2</sub> O | 0.03303  | KG   |
| NaOH                                                                | 0.18308  | KG   |
| TPABr                                                               | 0.26467  | KG   |
| H <sub>2</sub> O                                                    | 14.328   | L    |
| Energy (stirring and heating)                                       | 67.8     | KWh  |
| Output                                                              |          |      |
| ZSM-5-T1                                                            | 0.995    | KG   |
| Step3: Pt/ZSM-5 Preparation                                         |          |      |
| Input                                                               |          |      |
| Pt                                                                  | 0.005    | KG   |
| ZSM-5-T1                                                            | 0.995    | KG   |
| Energy (stirring and heating)                                       | 40.2     | KWh  |
| Output                                                              |          |      |
| Pt/ZSM-5-T1                                                         | 1        | KG   |

| Pt/ZSM-5-T2 in This work                                            |          |      |
|---------------------------------------------------------------------|----------|------|
| Input/Output                                                        | Quantity | Unit |
| Step1: Rice husk powder Pre-treatment                               |          |      |
| Input                                                               |          |      |
| Rice husk powder                                                    | 6.965    | KG   |
| Energy (heating)                                                    | 12.25    | KW-h |
| Output                                                              |          |      |
| SiO <sub>2</sub> -8.7% C template (T2)                              | 1.3134   | KG   |
| Step2: ZSM-5 Synthesis                                              |          |      |
| Input                                                               |          |      |
| T2                                                                  | 1.3134   | KG   |
| Al <sub>2</sub> (SO <sub>4</sub> ) <sub>3</sub> ·18H <sub>2</sub> O | 0.03303  | KG   |
| NaOH                                                                | 0.18308  | KG   |
| TPABr                                                               | 0.26467  | KG   |
| H <sub>2</sub> O                                                    | 14.328   | L    |
| Energy (stirring and heating)                                       | 67.8     | KWh  |
| Output                                                              |          |      |
| ZSM-5-T2                                                            | 0.995    | KG   |
| Step3: Pt/ZSM-5 Preparation                                         |          |      |
| Input                                                               |          |      |
| Pt                                                                  | 0.005    | KG   |
| ZSM-5-T2                                                            | 0.995    | KG   |
| Energy (stirring and heating)                                       | 40.2     | KWh  |
| Output                                                              |          |      |
| Pt/ZSM-5-T2                                                         | 1        | KG   |

| Pt/ZSM-5-T3 in This work                                            |          |      |
|---------------------------------------------------------------------|----------|------|
| Input/Output                                                        | Quantity | Unit |
| Step1: Rice husk powder Pre-treatment                               |          |      |
| Input                                                               |          |      |
| Rice husk powder                                                    | 6.965    | KG   |
| Energy (heating)                                                    | 8.75     | KW-h |
| Output                                                              |          |      |
| SiO <sub>2</sub> -23.6% C template (T3)                             | 1.56414  | KG   |
| Step2: ZSM-5 Synthesis                                              |          |      |
| Input                                                               |          |      |
| T3                                                                  | 1.56414  | KG   |
| Al <sub>2</sub> (SO <sub>4</sub> ) <sub>3</sub> ·18H <sub>2</sub> O | 0.03303  | KG   |
| NaOH                                                                | 0.18308  | KG   |
| TPABr                                                               | 0.26467  | KG   |
| H <sub>2</sub> O                                                    | 14.328   | L    |
| Energy (stirring and heating)                                       | 67.8     | KWh  |
| Output                                                              |          |      |
| ZSM-5-T3                                                            | 0.995    | KG   |
| Step3: Pt/ZSM-5 Preparation                                         |          |      |
| Input                                                               |          |      |
| Pt                                                                  | 0.005    | KG   |
| ZSM-5-T3                                                            | 0.995    | KG   |
| Energy (stirring and heating)                                       | 40.2     | KWh  |
| Output                                                              |          |      |
| Pt/ZSM-5-T3                                                         | 1        | KG   |

| Catalyst A: Pt/ZSM-5-C        |          |      |
|-------------------------------|----------|------|
| Input/Output                  | Quantity | Unit |
| Step1: ZSM-5 Synthesis        |          |      |
| Input                         |          |      |
| TEOS                          | 4.2188   | KG   |
| NaAlO <sub>2</sub>            | 0.00816  | KG   |
| NaOH                          | 0.18308  | KG   |
| TPAOH                         | 0.48556  | KG   |
| H <sub>2</sub> O              | 10.746   | L    |
| Energy (stirring and heating) | 67.8     | KWh  |
| Output                        |          |      |
| ZSM-5-C                       | 0.995    | KG   |
| Step2: Pt/ZSM-5 Preparation   |          |      |
| Input                         |          |      |
| Pt                            | 0.005    | KG   |
| ZSM-5-C                       | 0.995    | KG   |
| Energy (stirring and heating) | 40.2     | KWh  |
| Output                        |          |      |
| Pt/ZSM-5-C                    | 1        | KG   |

## References

- [1] R. Khoshbin, R. Karimzadeh, *Adv. Powder Technol.*, 2017, **28**, 1888-1897.
- [2] G. Liu, Y. Tian, B. Zhang, L. Wang, X. Zhang, *J. Hazard. Mater.*, 2019, **367**, 568-576.
- [3] Z. Wang, P. Ma, K. Zheng, C. Wang, Y. Liu, H. Dai, C. Wang, H. Hsi, J. Deng, *Appl. Catal. B-Environ.*, 2020, **274**, 118963.
- [4] Y. Li, T. Chen, S. Zhao, P. Wu, Y. Chong, A. Li, Y. Zhao, G. Chen, X. Jin, Y. Qiu, D. Ye, *ACS Catal.*, 2022, **1**, 4906-4917.
- [5] M. Xiao, X. Yu, Y. Guo, M. Ge, *Environ. Sci. Technol.*, 2022, **56**, 1376-1385.
- [6] Y. Zhang, J. Lu, L. Zhang, T. Fu, J. Zhang, X. Zhu, D. He, Y. Luo, D. Dionysiou, W. Zhu, *Appl. Catal. B-Environ.*, 2022, **309**, 121249.
- [7] T. Fu, Y. Zhang, D. Wu, W. Zhu, X. Gao, C. Han, Y. Luo, W. Ma, D. Dionysiou, *J. Hazard. Mater.*, 2020, **397**, 122630.
- [8] X. Liu, Q. Han, W. Shi, C. Zhang, E. Li, T. Zhu, *J. Catal.*, 2019, **369**, 482-492.
- [9] Y. Jiang, J. Gao, Q. Zhang, Z. Liu, M. Fu, J. Wu, Y. Hu, D. Ye, *Chem. Eng. J.*, 2019, **371**, 78-87.
